# Supplementary material for: Mitochondrial Dysfunction Leads to Deconjugation of Quercetin Glucuronides in Inflammatory Macrophages
Source: PubMed Central journal article supplement (PMC3834324; doi:10.1371/journal.pone.0080843), 2013-11-19
Supplement: pone.0080843.s004.pdf [file pone.0080843.s004.pdf]

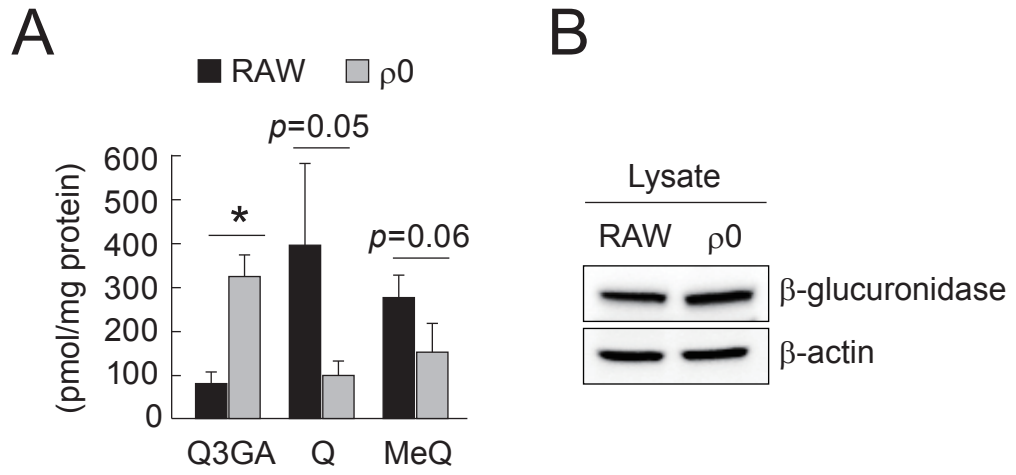

Fig. S4  
Ishisaka et al
